# Supplementary material
Source: ML conference proceedings conference paper supplement (https://openaccess.thecvf.com/content/WACV2022/html/Varga_SeaDronesSee_A_Maritime_WACV_2022_paper.html)
Supplement: Supplementary file 1 [file Varga_SeaDronesSee_A_Maritime_WACV_2022_supplemental.zip]

Archive with 2 entries (2 files):
- 0770-supp.pdf
- 0770-video.mp4
